# Supplementary material for: Gaucher Disease: Transcriptome Analyses Using Microarray or mRNA Sequencing in a Gba1 Mutant Mouse Model Treated with Velaglucerase alfa or Imiglucerase
Source: PLoS One. 2013 Oct 4;8(10):e74912. doi: 10.1371/journal.pone.0074912 (PMC3790783; doi:10.1371/journal.pone.0074912)
Supplement: Table S10 — (XLSX) [file pone.0074912.s014.xlsx]

## Sheet: Sheet1
S Table 10. Top canonical pathways of the core DEGs in spleen, liver and lung under different treatment conditions in 9V/null vs WT
spleen	saline		imig		vela
Pathways	Ratio	p-value	Ratio	p-value	Ratio	p-value
EIF2 Signaling	33/205 (0.161)	4.38e-18	40/205 (0.195)	2.74e-15	34/205 (0.166)	4.95e-17
Oxidative Phosphorylation	29/159 (0.182)	7.56e-17	50/159(0.314)	1.12e-27	42/159 (-0.264)	3.43e-28
Mitochondrial Dysfunction	22/174 (0.126)	1e-10	42/174 (0.241)	2e-20	33/174 (0.19)	4.84e-19
Ubiquinone Biosynthesis	13/110 (0.118)	1.62e-07	22/110 (0.2)	2.34e-11	16/110 (0.145)	2.14e-09
Regulation of eIF4 and p70S6K Signaling	17/176 (0.097)	5.23e-07			18/176 (0.102)	8.93e-07
Protein Ubiquitination Pathway			34/269 (0.126)	1.42e-07
Liver	saline		imig		vela
Pathways	Ratio	p-value	Ratio	p-value	Ratio	p-value
Oxidative Phosphorylation	19/159(0.119)	1.8e-17
Ubiquinone Biosynthesis	8/114 (0.07)	1.67e-07
Mitochondrial Dysfunction	9/174 (0.052)	2.5e-06
Atherosclerosis Signaling	7/131 (0.053)	7.9e-05
LXR/RXR Activation	6/136 (0.044)	0.000678	3/136 (0.022)	0.00619
VDR/RXR Activation			3/81(0.074)	0.00179
Acute Phase Response Signaling					3/177 (0.017)	0.00169
IL-17A Signaling in Fibroblasts					2/40 (0.05)	0.00116
JAK/Stat Signaling					2/70 (0.029)	0.00418
NRF2-mediated Oxidative Stress Response					3/191 (0.016)	0.0021
Androgen and Estrogen Metabolism			3/130 (0.023)	0.00179
Calcium Signaling			4/210 (0.019)	0.00215	4/210 ( .019)	0.00011
Lung	Saline		imig		vela
Pathways	Ratio	p-value	Ratio	p-value	Ratio	p-value
Communication between Innate and Adaptive Immune Cells	13/110(0.118)	6.13e-11	14/110	1.73e-11	9/110(0.082)	2.14e-07
LXR/RXR Activation	12/136(0.088)	3.34e-08			10/136 (0.074)	3.24e-07
Dendritic Cell Maturation	15/207(0.072)	3.62e-09	16/207 (0.077)	2.08e-09	11/207 (0.053)	1.08e-06
TREM1 Signaling			9/71 (0.127)	8.82e-08	7/71 (0.099)	1.5e-06
Atherosclerosis Signaling	15/131(0.115)	1.07e-11	13/131 (0.099)	6.19e-09	9/131 (0.069	1.92e-06
Altered T Cell and B Cell Signaling in Rheumatoid Arthritis			10/92 (0.109)	2.01e-07
Role of Hypercytokinemia/hyperchemokinemia in the Pathogenesis of Influenza	7/44 (0.159)	7.88e-07
